# Supplementary material
Source: Springer Nature journal article supplement (https://www.springermedizin.de/resource/supplementary/12890_2012_414_MOESM2_ESM.pdf/9505126)
Supplement: MOESM2 [file 9505126]

Studies identified after applying the search strategy to 6 databases  
**n = 2336**

Studies excluded, not relevant **n = 2321**

Studies retrieved for review of full text  
**n = 15**  
(12 studies available as full text,  
3 studies available in abstract form only)

Studies excluded **n = 6**  
no markers of airway inflammation evaluated **n = 3** <sup>(20,21,22)</sup>  
duplicate publication **n = 2** <sup>(23,24)</sup>  
Insufficient information **n=1** <sup>(25)</sup>

Additional studies included after reviewing the reference lists of all 15 articles **n = 1** <sup>(26)</sup>

Studies included in the systematic review  
**n = 10**  
(**n=9 full text,**  
**n=1 only published in abstract form)**
